# Supplementary material for: Pathogenesis of Rift Valley Fever Virus Aerosol Infection in STAT2 Knockout Hamsters
Source: MDPI journal article supplement (doi:10.3390/v10110651), 2018-11-19
Supplement: s1 [file s1]

**Supplementary Materials:** The following are available online at [www.mdpi.com/xxx/s1](http://www.mdpi.com/xxx/s1), Table S1: Blood chemistry values during the course of the RVFV MP-12 infection in *STAT2* KO hamsters.

| Blood Chemistry | Day 1         | Day 2         | Day 3         | Day 4         | Day 5                 | Controls      |
|-----------------|---------------|---------------|---------------|---------------|-----------------------|---------------|
| TP mg/dL        | 6.0 ± 0.6     | 5.8 ± 0.6     | 5.6 ± 0.7     | 5.8 ± 0.5     | 5.0 ± 0.6             | 5.8 ± 0.6     |
| ALB g/dL        | 2.8 ± 0.2     | 2.8 ± 0.1     | 2.6 ± 0.3     | 2.7 ± 0.3     | 2.1 ± 0.5             | 2.7 ± 0.1     |
| ALP U/L         | 207.3 ± 61.2  | 223.7 ± 132.6 | 454.7 ± 469.3 | 396.5 ± 284.6 | 721.7 ± 470.0         | 302.0 ± 141.4 |
| GLU mg/dL       | 130.7 ± 39.11 | 129.3 ± 20.01 | 101.3 ± 22.12 | 74 ± 38.06    | 52.67 ± 57.46         | 132.0 ± 12.7  |
| TBIL mg/dL      | 0.2 ± 0.1     | 0.2 ± 0.2     | 0.1 ± 0.0     | 0.1 ± 0.0     | 1.5 ± 1.8             | 0.1 ± 0.0     |
| PHOS mg/dL      | 7.8 ± 1.1     | 8.7 ± 0.6     | 8.2 ± 0.8     | 7.9 ± 2.5     | 12.5 ± 3.4            | 9.0 ± 0.8     |
| CHOL mg/dL      | 169.7 ± 25.0  | 159.2 ± 27.0  | 131.0 ± 16.5  | 146.3 ± 18.5  | <b>105.0 ± 15.5**</b> | 174.0 ± 12.7  |
| GGT U/L         | 10.0 ± 0.0    | 10.0 ± 0.0    | 10.0 ± 0.0    | 10.0 ± 0.0    | 10.0 ± 0.0            | 10.0 ± 0.0    |
| ALT U/L         | 74.0 ± 38.0   | 51.3 ± 12.5   | 36.0 ± 2.7    | 153.5 ± 153.9 | <b>681.3 ± 552.0*</b> | 39.5 ± 5.0    |
| Ca mg/dL        | 12.8 ± 2.0    | 14.5 ± 0.7    | 13.4 ± 0.7    | 12.2 ± 1.1    | 11.8 ± 3.8            | 14.5 ± 0.2    |
| CRE mg/dL       | 0.2 ± 0.0     | 0.2 ± 0.0     | 0.2 ± 0.0     | 0.2 ± 0.0     | 0.3 ± 0.1             | 0.2 ± 0.0     |
| BUN mg/dL       | 17.0 ± 3.3    | 21.8 ± 4.2    | 17.8 ± 1.3    | 16.2 ± 3.8    | 36.8 ± 36.6           | 21.1 ± 4.4    |
| AST U/L         | 63.7 ± 16.9   | 106.7 ± 51.0  | 75.0 ± 17.1   | 213.5 ± 242.3 | <b>704.7 ± 511.5*</b> | 69.5 ± 26.2   |

Prior to infection 3-4 animals were designated for sacrifice on days 1-5 p.i. (n = 3/group for days 1-3 and 5; n = 4 for day 4). One animal in the day 5 group succumbed to infection prior to sacrifice and therefore plasma could not be obtained. Data are reported as the group mean and standard deviation (for the 2 sham-infected controls, the mean and range is given). \**P* < 0.05, \*\**P* < 0.01 compared to day 1 RVFV MP-12-infected animals (n = 3). Statistically significant differences are indicated by bold font.

**Supplementary Materials:** The following are available online at [www.mdpi.com/xxx/s1](http://www.mdpi.com/xxx/s1), Table S2: Hematology values during the course of the RVFV MP-12 infection in *STAT2* KO hamsters.

| Hematology           | Day 1                           | Day 2                           | Day 3                             | Day 4                                                        | Day 5                           | Controls                        |
|----------------------|---------------------------------|---------------------------------|-----------------------------------|--------------------------------------------------------------|---------------------------------|---------------------------------|
| RBC M/ $\mu$ l       | 7.9 $\pm$ 0.4                   | 7.5 $\pm$ 0.5                   | 7.0 $\pm$ 0.4                     | 7.7 $\pm$ 0.2                                                | 8.4 $\pm$ 1.2                   | 7.4 $\pm$ 0.4                   |
| Calc HGB g/dL        | 19.0 $\pm$ 0.8                  | 18.2 $\pm$ 1.2                  | 17.6 $\pm$ 1.5                    | 19.2 $\pm$ 0.4                                               | 20.1 $\pm$ 2.5                  | 18.0 $\pm$ 0.7                  |
| HCT %                | 50.4 $\pm$ 2.5                  | 47.5 $\pm$ 2.1                  | 44.1 $\pm$ 3.2                    | 48.7 $\pm$ 1.4                                               | 53.8 $\pm$ 7.4                  | 47.3 $\pm$ 2.1                  |
| MCV fL               | 63.4 $\pm$ 0.3                  | 63.4 $\pm$ 1.3                  | 63.0 $\pm$ 1.4                    | 63.6 $\pm$ 1.2                                               | 63.9 $\pm$ 1.1                  | 63.8 $\pm$ 0.1                  |
| MCH fL               | 24.0 $\pm$ 0.1                  | 24.3 $\pm$ 0.2                  | 25.1 $\pm$ 0.9                    | 25.1 $\pm$ 0.7                                               | 23.8 $\pm$ 1.1                  | 24.3 $\pm$ 0.1                  |
| MCHC g/dL            | 37.7 $\pm$ 1.2                  | 38.4 $\pm$ 1.0                  | <b>39.7 <math>\pm</math> 0.6*</b> | 39.5 $\pm$ 0.6                                               | 37.2 $\pm$ 1.0                  | 38.1 $\pm$ 0.1                  |
| CHCM g/dL            | 33.5 $\pm$ 0.4                  | 33.5 $\pm$ 0.5                  | 33.9 $\pm$ 0.1                    | 33.6 $\pm$ 0.5                                               | 32.6 $\pm$ 2.0                  | 33.3 $\pm$ 0.1                  |
| RDW %                | 16.3 $\pm$ 0.3                  | 16.0 $\pm$ 2.3                  | 16.0 $\pm$ 1.1                    | 17.3 $\pm$ 1.4                                               | 15.9 $\pm$ 2.3                  | 17.0 $\pm$ 1.2                  |
| WBC K/ $\mu$ L       | 6.0 $\pm$ 0.9                   | 4.5 $\pm$ 0.9                   | 8.6 $\pm$ 4.8                     | 4.4 $\pm$ 2.2                                                | 3.5 $\pm$ 2.5                   | 8.74 $\pm$ 0.6                  |
| Band K/ $\mu$ L (%)  | 0.1 $\pm$ 0.1 (2.0 $\pm$ 2.7)   | 0.1 $\pm$ 0.1 (2.7 $\pm$ 0.6)   | 0.3 $\pm$ 0.2 (4.0 $\pm$ 2.6)     | 0.0 $\pm$ 0.0 (0.5 $\pm$ 1.0)                                | 0.0 $\pm$ 0.0 (0.0 $\pm$ 0.0)   | 0.2 $\pm$ 0.0 (1.5 $\pm$ 0.7)   |
| Neut K/ $\mu$ L (%)  | 2.1 $\pm$ 0.3 (35.7 $\pm$ 9.1)  | 2.3 $\pm$ 1.2 (48.7 $\pm$ 16.3) | 5.6 $\pm$ 3.9 (63.3 $\pm$ 16.1)   | 3.2 $\pm$ 1.6 (74.3 $\pm$ 8.3)                               | 1.7 $\pm$ 2.2 (34.0 $\pm$ 34.2) | 3.5 $\pm$ 2.3 (39.0 $\pm$ 24.0) |
| Lymph K/ $\mu$ L (%) | 3.4 $\pm$ 1.3 (55.0 $\pm$ 13.1) | 1.8 $\pm$ 0.5 (42.7 $\pm$ 15.7) | 1.9 $\pm$ 1.0 (26.0 $\pm$ 17.6)   | 0.9 $\pm$ 0.8 (20.3 $\pm$ 8.6)                               | 1.2 $\pm$ 0.5 (44.7 $\pm$ 20.0) | 4.3 $\pm$ 2.6 (50.5 $\pm$ 33.2) |
| Mono K/ $\mu$ L (%)  | 0.3 $\pm$ 0.1 (6.3 $\pm$ 3.2)   | 0.2 $\pm$ 0.1 (3.7 $\pm$ 0.6)   | 0.5 $\pm$ 0.3 (5.7 $\pm$ 0.6)     | 0.2 $\pm$ 0.1 (5.0 $\pm$ 0.8)                                | 0.5 $\pm$ 0.3 (20.0 $\pm$ 13.8) | 1.2 $\pm$ 0.3 (9.5 $\pm$ 0.7 )  |
| Eos K/ $\mu$ L (%)   | 0.2 $\pm$ 0.1 (2.7 $\pm$ 2.1)   | 0.1 $\pm$ 0.0 (2.3 $\pm$ 1.2)   | 0.1 $\pm$ 0.1 (0.3 $\pm$ 0.6)     | <b>0.0 <math>\pm</math> 0.0* (0.0 <math>\pm</math> 0.0*)</b> | 0.0 $\pm$ 0.0 (0.7 $\pm$ 0.6)   | 0.5 $\pm$ 0.7 (0.5 $\pm$ 0.7 )  |
| Baso K/ $\mu$ L (%)  | 0.0 $\pm$ 0.0 (2.0 $\pm$ 1.0 )  | 0.0 $\pm$ 0.0 (0.0 $\pm$ 0.0)   | 0.1 $\pm$ 0.1 (0.7 $\pm$ 1.2)     | 0.0 $\pm$ 0.0 (0.0 $\pm$ 0.0)                                | 0.0 $\pm$ 0.0 (0.7 $\pm$ 1.2)   | 0.0 $\pm$ 0.0 (0.0 $\pm$ 0.0)   |
| PLT K/ $\mu$ L       | 744.3 $\pm$ 77.3                | 647.7 $\pm$ 234.9               | 808.7 $\pm$ 312.4                 | 536.0 $\pm$ 269.0                                            | 459.3 $\pm$ 250.9               | 1079.0 $\pm$ 82.7               |

|        |           |           |           |           |           |           |
|--------|-----------|-----------|-----------|-----------|-----------|-----------|
| MPV fL | 6.2 ± 0.1 | 6.2 ± 0.4 | 6.3 ± 0.4 | 6.5 ± 0.2 | 7.6 ± 2.1 | 6.3 ± 0.1 |
|--------|-----------|-----------|-----------|-----------|-----------|-----------|

Prior to infection 3-4 animals were designated for sacrifice on days 1-5 p.i. (n = 3/group for days 1-3 and 5; n = 4 for day 4). One animal in the day 5 group succumbed to infection prior to sacrifice and therefore plasma could not be obtained. Data are reported as the group mean and standard deviation (for the 2 sham-infected controls, the mean and range is given). \**P* < 0.05, \*\**P* < 0.01 compared to day 1 RVFV MP-12-infected animals (n = 3). Statistically significant differences are indicated by bold font.
